# Supplementary material
Source: Royal Society of Chemistry journal article supplement (doi:10.1039/d6tc00646a)
Supplement: d6tc00646a2.pdf [file d6tc00646a2.pdf]

1 Supporting information

2 **Trehalose-enhanced Anti-Freezing Conductive Hydrogels with High**  
3 **Stretchability and Low Hysteresis for Flexible Human-Machine**  
4 **Interaction**

5 *Fangying Lu<sup>a,b</sup>, Jingye Liang<sup>a,b</sup>, Xiya Shan<sup>a,b</sup>, Hanbing Yu<sup>a,b</sup>, Yiqiong Zhang<sup>a,b</sup>, Qian*  
6 *Ji<sup>a,b</sup>, Aoyun Ren<sup>a,b</sup>, Run Wang<sup>a,b\*</sup>*

7 <sup>a</sup>Ministry of Education Key Laboratory of Advanced Textile Composite Materials,  
8 Institute of Composite Materials, Tiangong University, 399 West Binshui Road, Tianjin  
9 300387, China.

10 <sup>b</sup>School of Textile Science and Engineering, Tiangong University, 399 West Binshui  
11 Road, Tianjin 300387, China.

12 **Corresponding author E-mail: wangrun@tiangong.edu.cn**

## 1 **Experimental Section**

### 2 **Materials**

3 Acrylamide (AM), polyvinyl alcohol (PVA) and trehalose were from Aladdin  
4 (Shanghai, China). N, N'-methylene-bis-acrylamide (MBAA), and ammonium  
5 persulfate (APS) were from Shanghai Yi'en Chemical Technology Co., Ltd (Shanghai,  
6 China). Lithium chloride (LiCl) was from Bide Pharmatech Co., Ltd (Shanghai, China).  
7 All chemicals were used without further purification.

### 8 **Preparation of PAM/PVA/Tre/Li<sup>+</sup> hydrogels**

9 PAM/PVA/Tre/Li<sup>+</sup> hydrogel was prepared by the one-pot free radical polymerization  
10 method. First, AM (3.00 g), PVA (0.15 g), trehalose (0.60 g), and LiCl (0.30 g), were  
11 added into deionized water (total mass of 11.05 g). The mixture was magnetically  
12 stirred in a 90.0°C water bath for 1 h to ensure uniformity, and then the solution was  
13 cooled to room temperature. Then APS (0.06 g) and MBAA (0.03 g) were added to the  
14 above solution, and the solution was stirred at room temperature until dissolved. The  
15 solution was poured into the mold and placed in the oven at 60.0°C for 2 h to induce  
16 free radical polymerization to prepare PAM/PVA/Tre/Li<sup>+</sup> hydrogel. Other hydrogels  
17 were prepared by the same method, different mass fractions of trehalose and LiCl added  
18 relative to the acrylamide monomer.

### 19 **Preparation of strain sensors and smart glove**

20 The hydrogel strain sensor was rectangular with a length of 20 mm, a width of 5 mm  
21 and a thickness of 1 mm. Subsequently, it was connected to wires at both ends and  
22 encapsulated with biomedical tape. Hydrogel fiber strain sensor was prepared by the  
23 same method.

24 Five hydrogel fiber strain sensors with a diameter of 1.2 mm were attached to the  
25 thumb, index, middle, ring and little fingers of a cotton glove for smart glove  
26 fabrication.

### 27 **Characterization**

1 The internal microstructure for hydrogels was characterized by using a scanning  
2 electron microscope at voltage of 100 kV. (SEM, Hitachi TM4000, Hitachi, Japan). The  
3 hydrogel samples were first swelled for 12 h to achieve equilibrium, then rapidly frozen  
4 in liquid nitrogen and freeze-dried thereafter. Attenuated total reflection Fourier-  
5 transform infrared spectroscopy was performed on the hydrogels using a spectrometer  
6 (Nicolet iS50, Thermo Fisher) in the range of 500 to 4000  $\text{cm}^{-1}$ . An ultraviolet-visible  
7 (UV-Vis) spectrophotometer (UH4150, Hitachi, Japan) was used to characterize the  
8 transparency of the hydrogels within the wavelength range of 200 to 800 nm. A 200F3  
9 DSC instrument (Germany) was used for differential scanning calorimetry (DSC)  
10 analysis, with a heating rate of 5  $\text{K min}^{-1}$ , ranging from  $-80.0^\circ\text{C}$  to  $20.0^\circ\text{C}$ , under a  
11 nitrogen atmosphere. The storage modulus ( $G'$ ) and loss modulus ( $G''$ ) of the hydrogel  
12 samples were measured using a modular compact rheometer (MCR302, Anton Paar  
13 GMBH, Austria) with an angular frequency sweep performed at a fixed strain of 1%,  
14 where the frequency was varied from 0.01 to 100  $\text{rad}\cdot\text{s}^{-1}$ .

### 15 **Environmental stability**

16 The mass retention rates of the hydrogels at different time intervals were determined  
17 by the weighing method after the hydrogels were equilibrated for 12 h at a constant  
18 temperature of  $20.0^\circ\text{C}$  and humidity of 40.0%. The mass ratio was defined as

$$\text{Mass ratio (\%)} = (M_i/M_0) \times 100\% \quad (\text{S1})$$

19 where  $M_i$  and  $M_0$  represent the mass of the hydrogel at different time points and its  
20 initial mass, respectively.

### 21 **Mechanical measurement**

22 Mechanical tensile tests were conducted on a universal testing machine (HY0580,  
23 Heng Yi, China). Unless otherwise specified, hydrogel samples with dimensions of  
24  $20.0 \times 7.0 \times 1.0$  mm (length  $\times$  width  $\times$  thickness) were tested at  $20.0^\circ\text{C}$  and 40.0%  
25 humidity with a tensile rate of 20  $\text{mm}\cdot\text{min}^{-1}$ . Loading–unloading tensile curves were  
26 used to assess the dissipative energy and hysteresis of the hydrogels. Dissipative energy

1 ( $\Delta E$ ), defined as the area enclosed by the loading–unloading loop, was calculated  
2 according to the following formula:

$$\left(\int \sigma d\varepsilon\right)_{Loading} - \left(\int \sigma d\varepsilon\right)_{Unloading} \quad (S2)$$

3 The hysteresis was defined by the Equation as the following formula:

$$Hysteresis = \Delta E / \left(\int \sigma d\varepsilon\right)_{Loading} \quad (S3)$$

4 where  $\sigma$  and  $\varepsilon$  represent tensile stress and strain, respectively.

5 The tensile stress ( $\sigma$ ) of hydrogels was defined by the Equation as the following  
6 formula:

$$\sigma = F/A \quad (S4)$$

7 where  $F$  was the load force recorded by the universal machine and  $A$  was the cross-  
8 sectional area of hydrogels.

9 The tensile strain ( $\varepsilon$ ) of the hydrogel microfiber was defined by the equation as the  
10 following formula:

$$\varepsilon = (l - l_0)/l_0 \times 100\% \quad (S5)$$

11 where  $l_0$  was the initial length of hydrogels between the fixtures and  $l$  was the length of  
12 hydrogels before breakage.

### 13 **Conductivity measurement**

14 The electrochemical workstation (CHI660E, Shanghai) was used to measure the  
15 electrochemical impedance spectroscopy of the hydrogel strain sensor, with a  
16 frequency range of 1.0 Hz to 1000 Hz and a voltage of 100.0 mV. Unless otherwise  
17 stated, the hydrogel strain sensor with  $20.0 \times 7.0 \times 1.0$  mm (length  $\times$  width  $\times$  thickness)  
18 was used for the electrical testing at a temperature of 20 °C and humidity of 40.0%. The  
19 ionic conductivity ( $\sigma$ , unit: S/m) was calculated according to the following equation:

$$\sigma = S/(LR) \quad (S6)$$

20 in which  $L$  (m),  $S$  (m<sup>2</sup>), and  $R$  ( $\Omega$ ) are the length, cross sectional area and resistance of  
21 samples, respectively.  $R$  is obtained from the intercept at the real part in Nyquist plots.

1 The LCR tester (IM3536) recorded the resistance signal of the hydrogel strain sensor  
2 during deformation, where the applied voltage was 1.0 V and the frequency was 800.0  
3 Hz. The relative resistance change ( $\Delta R/R_0$ ) and Gauge factor ( $GF$ ) were used to evaluate  
4 the sensing performance of the hydrogel strain sensor. The calculation formula was as  
5 follows:

$$\Delta R/R_0 = (R_s - R_0)/R_0 \quad (S7)$$

$$GF = (\Delta R/R_0)/\varepsilon \quad (S8)$$

6 where  $R_0$  represented the original resistance before the application of strain,  $R_s$   
7 represented the real-time resistance during the application of strain, and  $\varepsilon$  represented  
8 the strain. Measurement of the performance of hydrogel self-powered sensors by  
9 connecting the self-powered sensors with copper wire with a diameter of 1mm to an  
10 electrochemical workstation (CHI660E, Shanghai).

11 All experiments were conducted in triplicate unless stated otherwise. Error bars denote  
12 the standard deviation (SD), indicating the reproducibility and reliability of the  
13 experimental data.

#### 14 **Applications for hydrogel sensors and smart glove**

15 The hydrogel, copper sheet (2.0 mm) and copper wires were assembled to make a strain  
16 sensor Attachment of hydrogel strain sensors to various body parts and fingers with  
17 medical adhesive tape.

18 Five hydrogel fibers were individually woven onto the five finger stalls of a cotton  
19 fabric glove and connected with copper wires to assemble a smart glove, which was  
20 then linked to a robotic hand manipulator via conductive wires and integrated with an  
21 Arduino Nano board. Prior to the experiment, the program code was pre-loaded into  
22 the Arduino Nano board, which read signals from the analog pins and transmitted them  
23 to convert the resistance variations of the smart glove into gesture control signals for  
24 the robotic manipulator.

25

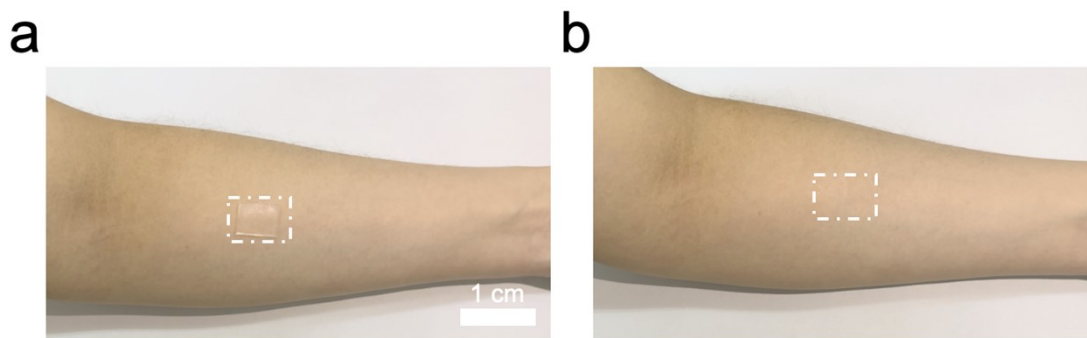

1

2 **Fig. S1** The biocompatibility of the PAM/PVA/Tre/Li<sup>+</sup> hydrogel: (a) applied on human  
 3 skin for 5 days, (b) skin condition after removal.

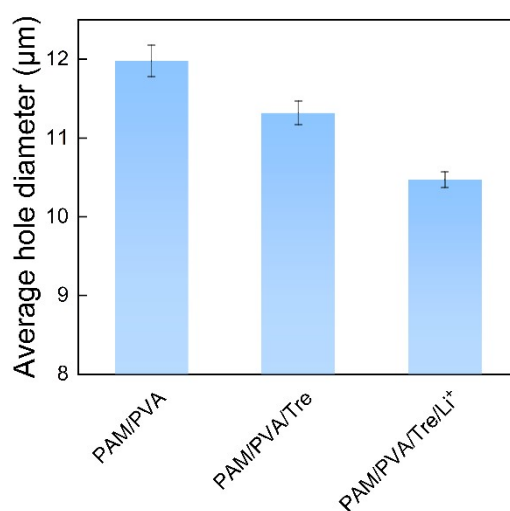

4

5 **Fig. S2** Average hole diameter of the PAM/PVA, PAM/PVA/Tre, and  
 6 PAM/PVA/Tre/Li<sup>+</sup> hydrogels.

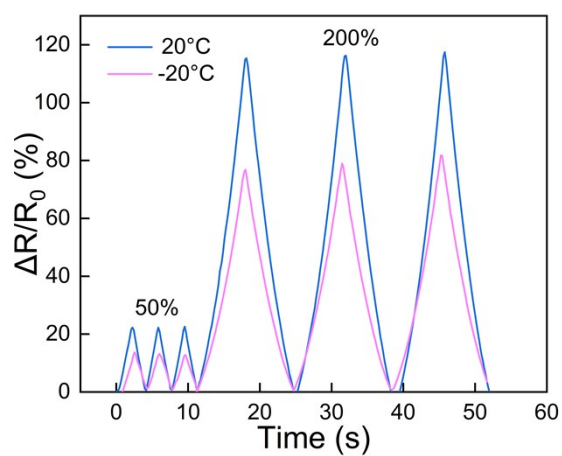

7

8 **Fig. S3** Dynamic relative resistance responses of PAM/PVA/Tre/Li<sup>+</sup> hydrogels under  
 9 50.0% and 200.0% tensile strains at 20.0°C and -20.0°C

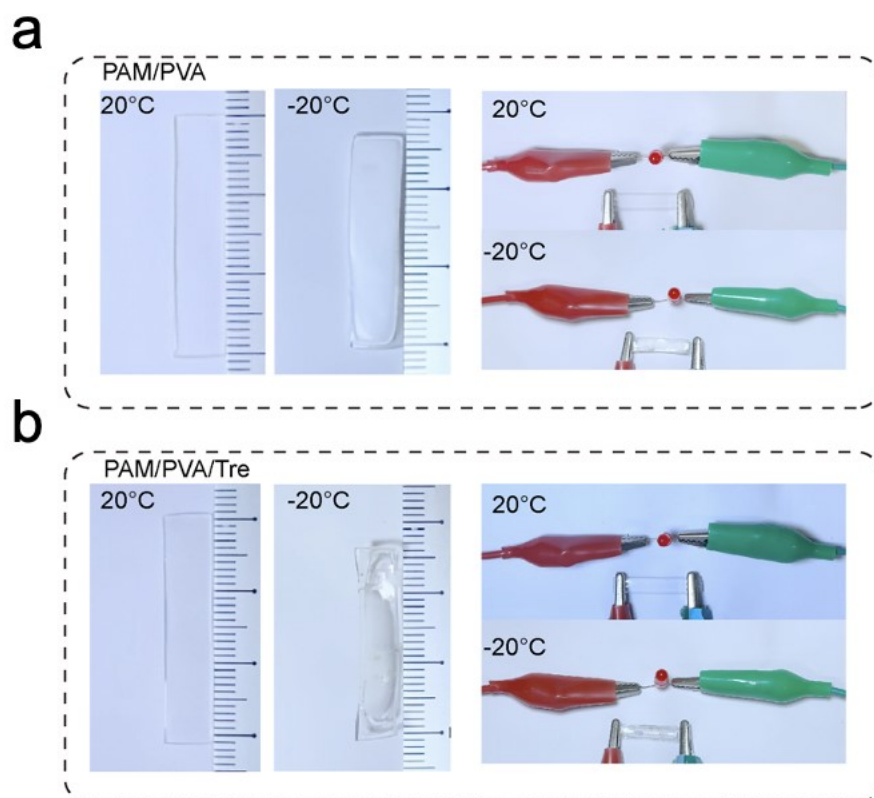

1  
 2 **Fig. S4** Photographs of the state and conductivity tests for (a) PAM/PVA, and (b)  
 3 PAM/PVA/Tre hydrogels at 20.0°C and -20.0°C.

4  
 5

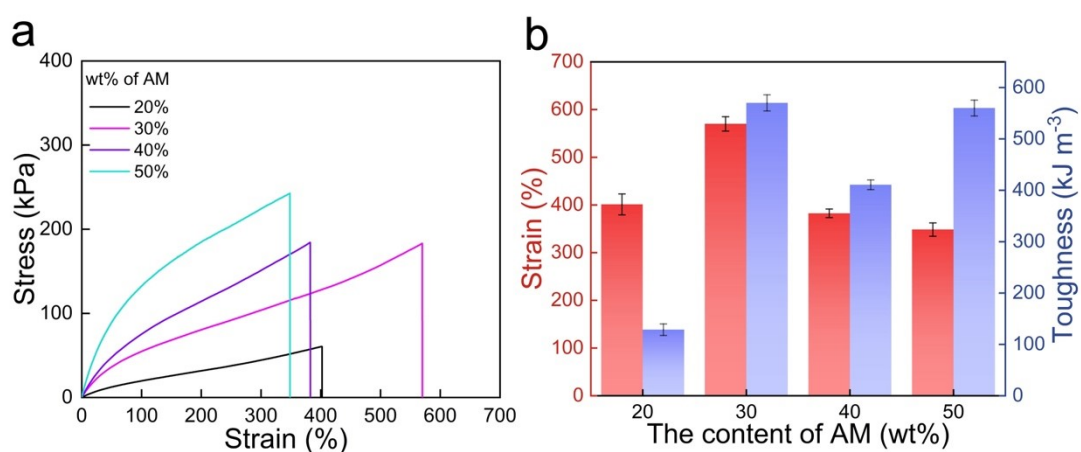

6  
 7 **Fig. S5** (a) Tensile stress-strain curves of hydrogels with different content of AM. (b)  
 8 The fracture strain and toughness of hydrogels with different content of AM.

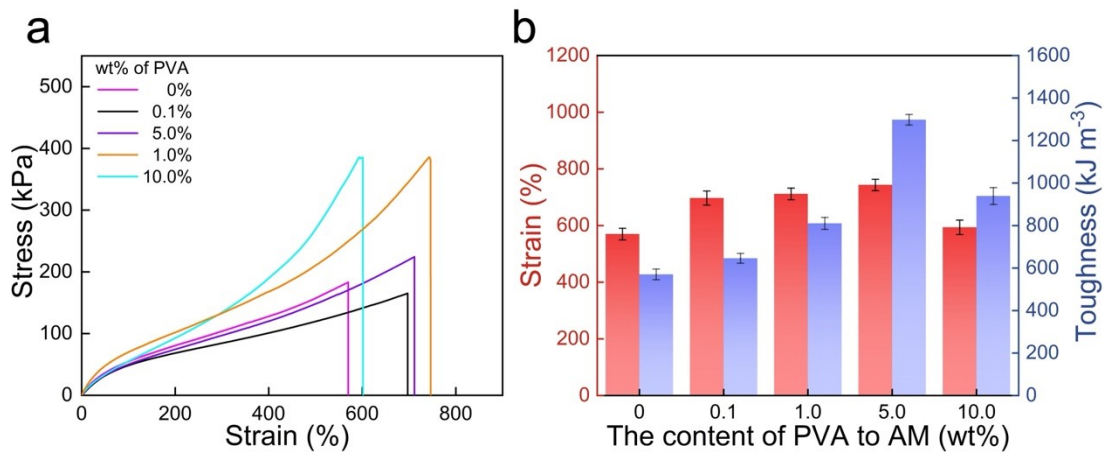

1

2 **Fig. S6** (a) Tensile stress-strain curves of hydrogels with different content of PVA. (b)

3 The fracture strain and toughness of hydrogels with different content of PVA.

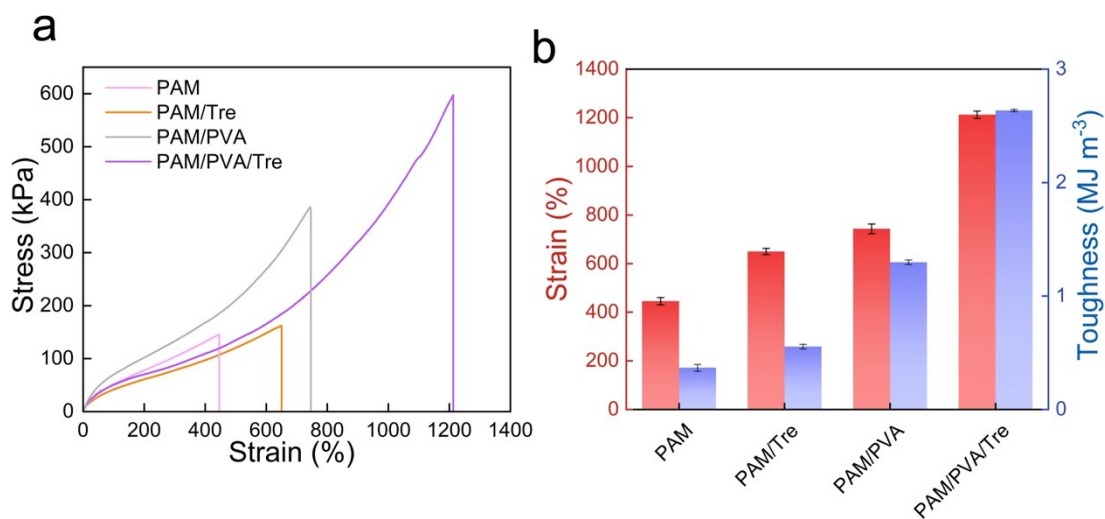

4

5 **Fig. S7** Mechanical properties of hydrogels with different component combinations:

6 (a) tensile stress-strain curves (b) fracture strain and toughness

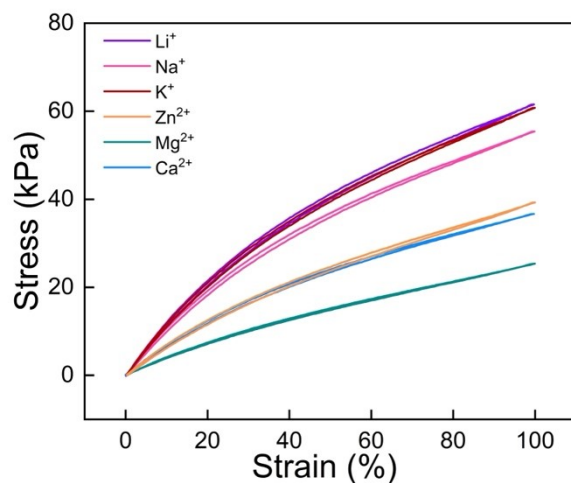

1

2 **Fig. S8** Detailed stress-recovery curves and stability tests of hydrogels doped with  
 3 different salts under 100.0% cyclic stretch.

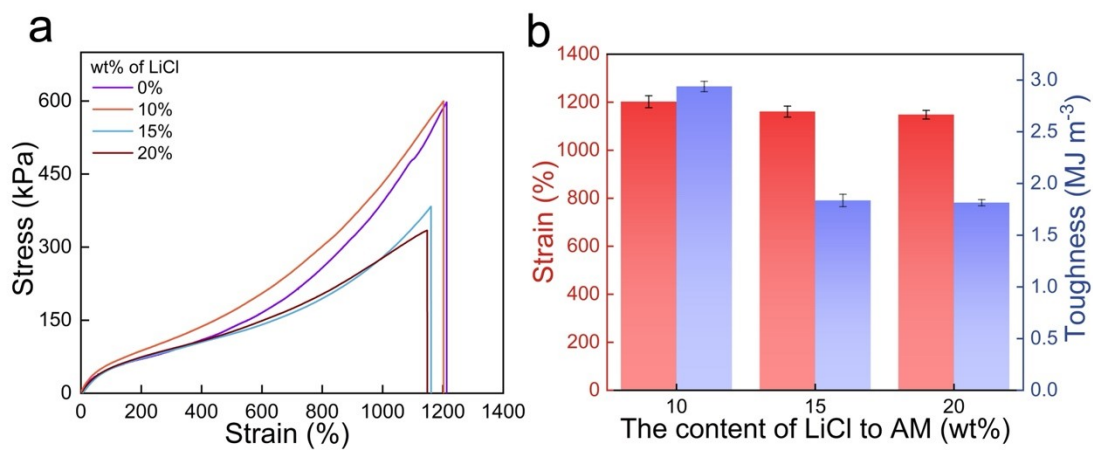

4

5 **Fig. S9** (a) Tensile stress-strain curves of hydrogels with different content of LiCl. (b)  
 6 The fracture strain and toughness of hydrogels with different content of LiCl.

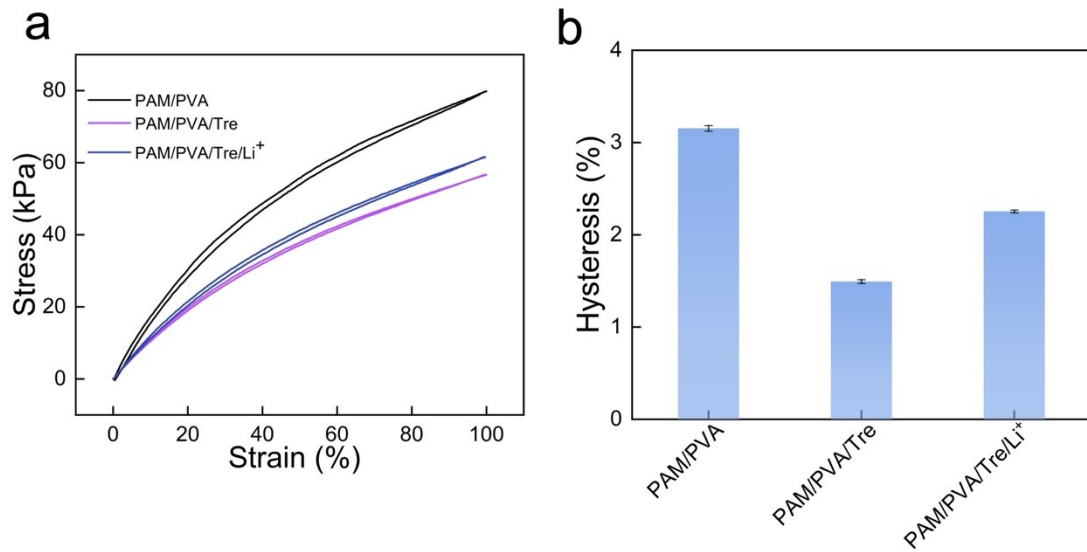

1

2 **Fig. S10** Mechanical hysteresis behavior of hydrogels with different components: (a)

3 loading-unloading stress-strain curves (b) hysteresis ratio

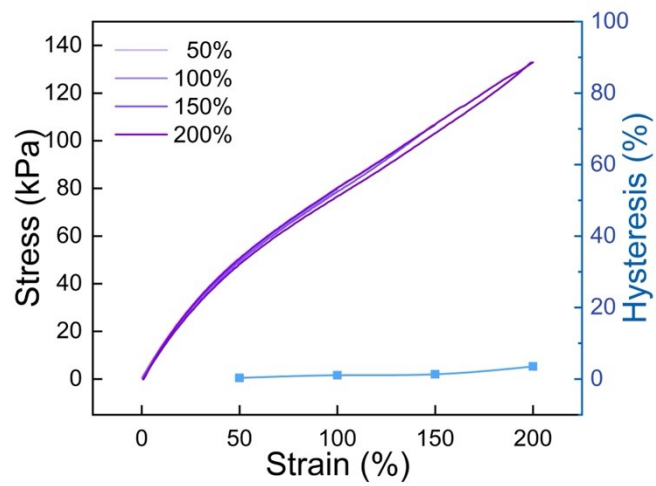

4

5 **Fig. S11** Successive loading-unloading curves and mechanical hysteresis of the

6 PAM/PVA/Tre/Li<sup>+</sup> hydrogel.

7

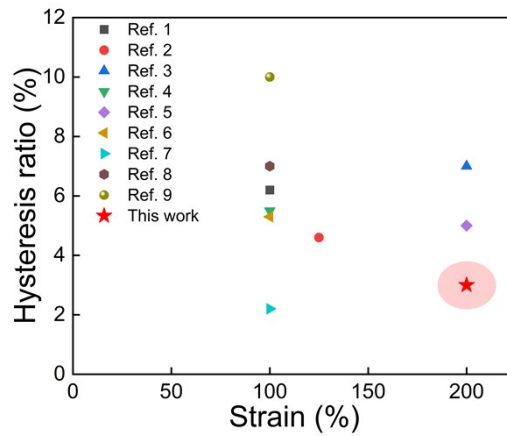

1

2 **Fig. S12** Comparison of the hysteresis and strain of PAM/PVA/Tre/Li<sup>+</sup> hydrogels with  
 3 those of previously reported hydrogels.

4

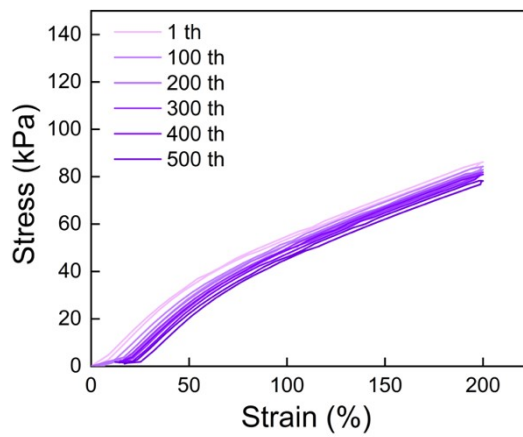

5

6 **Fig. S13** Detailed stress-recovery curves and stability test of the PAM/PVA/Tre/Li<sup>+</sup>  
 7 hydrogel under a cyclic stretch of 200.0% for 500 cycles.

8

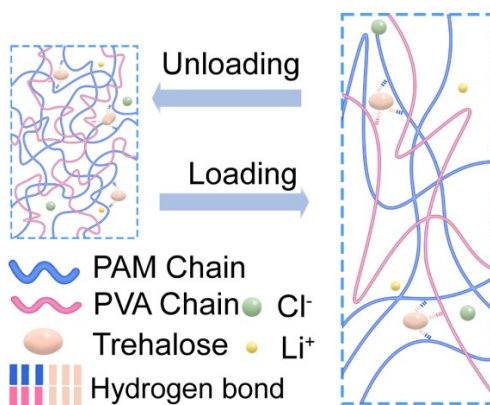

1

2 **Fig. S14** Schematic illustration of the crosslinked network structure of the  
 3 PAM/PVA/Tre/Li<sup>+</sup> hydrogel during the stretch-release cycle.

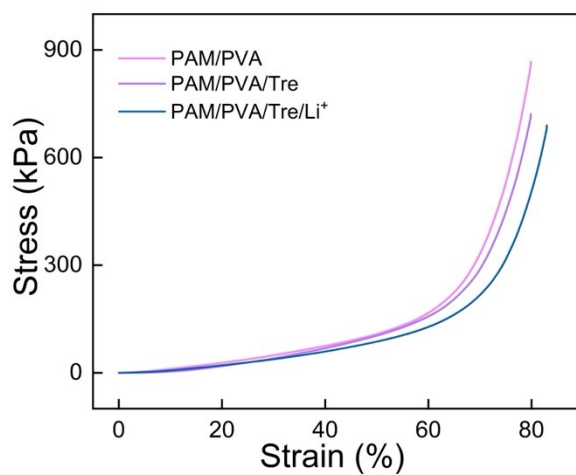

4

5 **Fig. S15** Compressive stress-strain curves of PAM/PVA, PAM/PVA/Tre, and  
 6 PAM/PVA/Tre/Li<sup>+</sup> hydrogels.

7

8

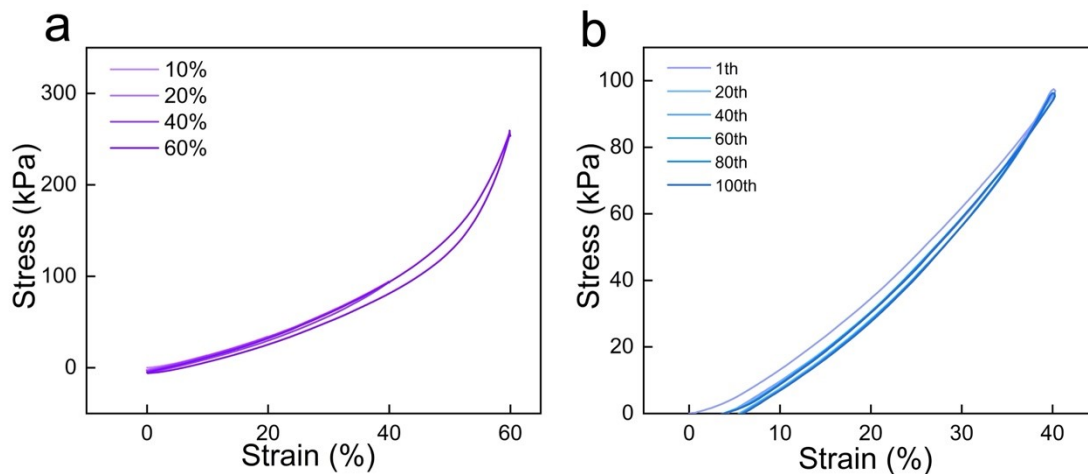

1  
 2 **Fig. S16** (a) Stress-recovery curves of PAM/PVA/Tre hydrogel under different  
 3 compression strains. (b) Cyclic compression test of PAM/PVA/Tre hydrogel under  
 4 compression at the range of 0-40.0% over 100 cycles.

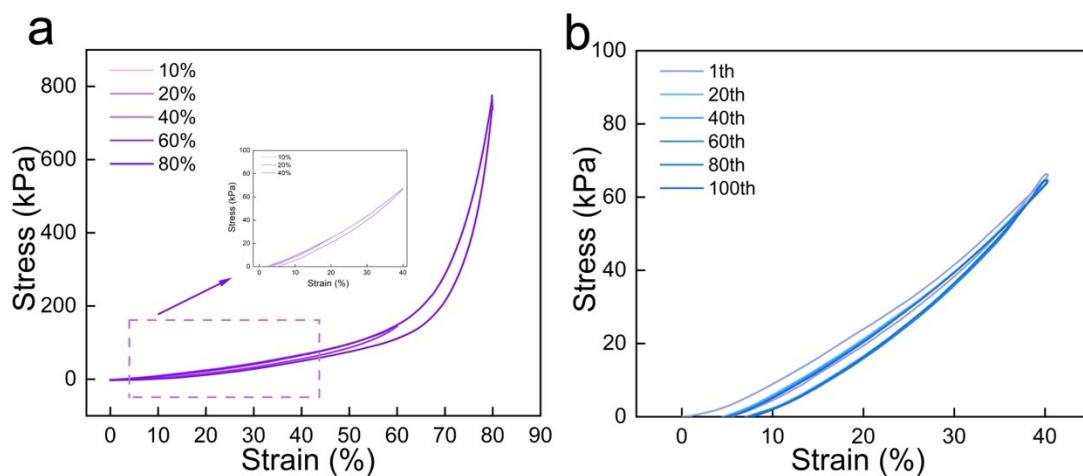

5  
 6 **Fig. S17** (a) Stress-recovery curves of PAM/PVA/Tre/Li<sup>+</sup> hydrogel under different  
 7 compression strains. (b) Cyclic compression test of PAM/PVA/Tre/Li<sup>+</sup> hydrogel  
 8 under compression at the range of 0-40.0% over 100 cycles.

9

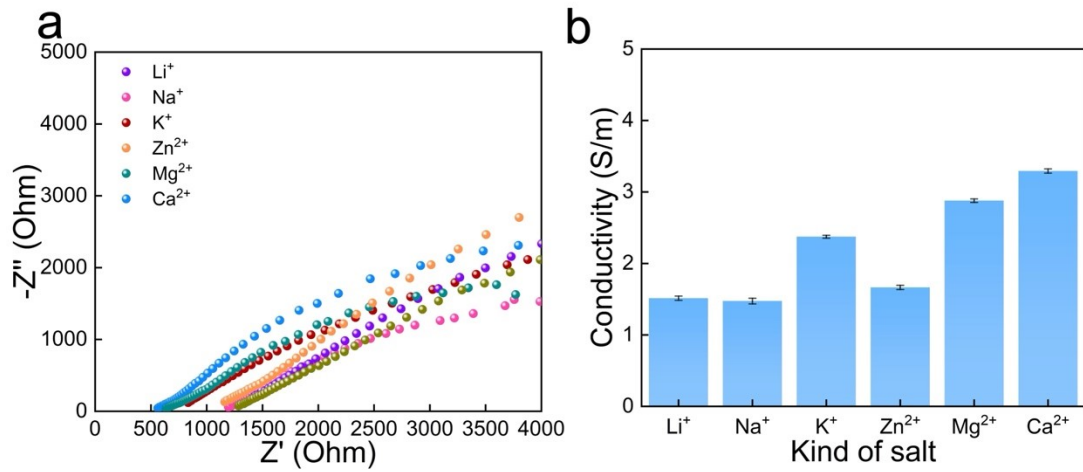

1

2 **Fig. S18** (a) Electrochemical impedance spectroscopy (EIS) Nyquist plots and (b)

3 corresponding ionic conductivity of hydrogels doped with different salts.

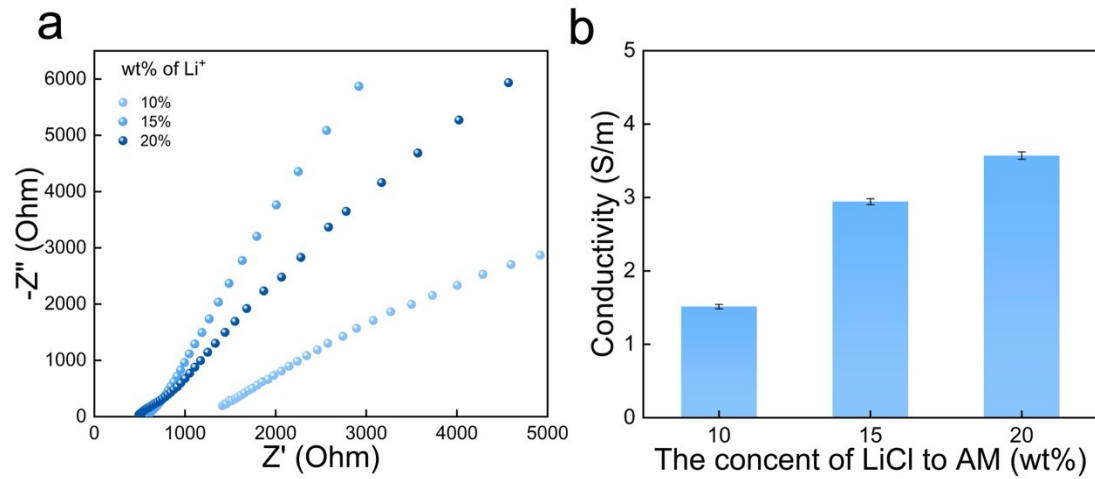

4

5 **Fig. S19** (a) Electrochemical impedance spectroscopy (EIS) Nyquist plots and (b)

6 corresponding ionic conductivity of hydrogels doped with different content of LiCl.

7

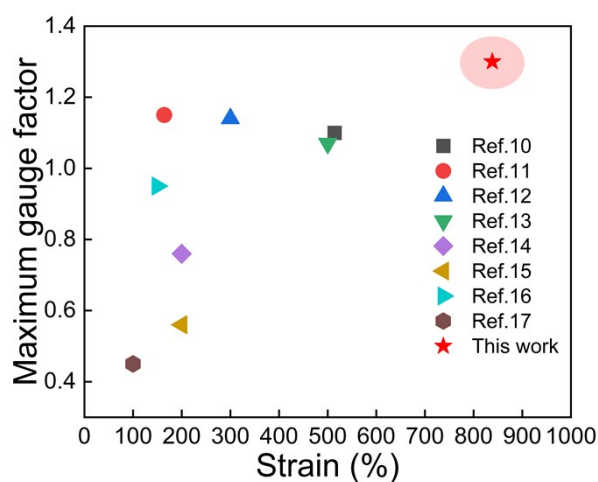

1

2 **Fig. S20** Comparison of the maximum gauge factor of the PAM/PVA/Tre/Li<sup>+</sup> hydrogel  
 3 sensor with those of previously reported hydrogels.

4

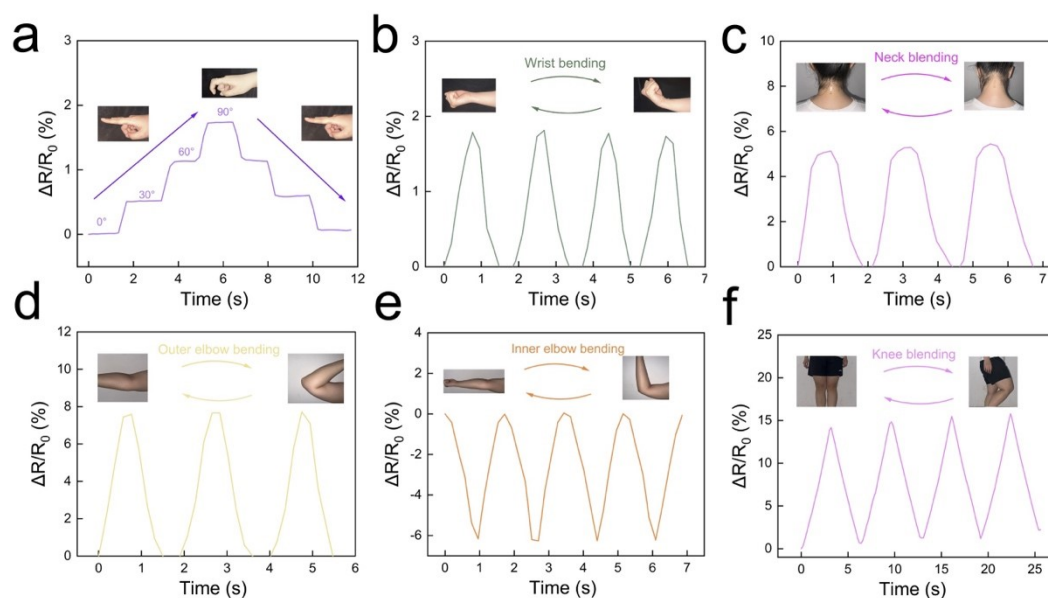

5

6 **Fig. S21** Wearable applications of flexible resistive strain sensors based on  
 7 PAM/PVA/Tre/Li<sup>+</sup> hydrogels. (a-d) Signal of relative resistance changes by bending  
 8 finger, wrist, neck, elbow, and leg.

9

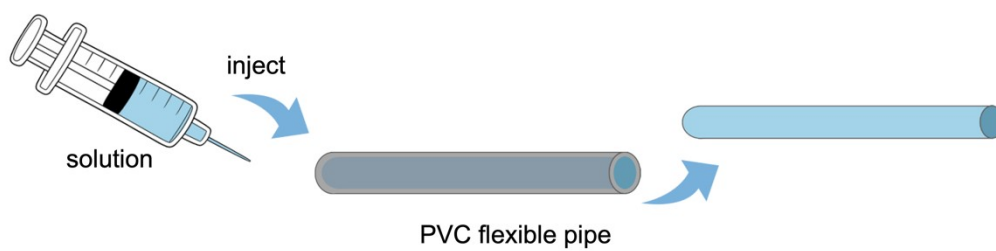

1

2 **Fig. S22** Schematic illustration of hydrogel fiber preparation

3

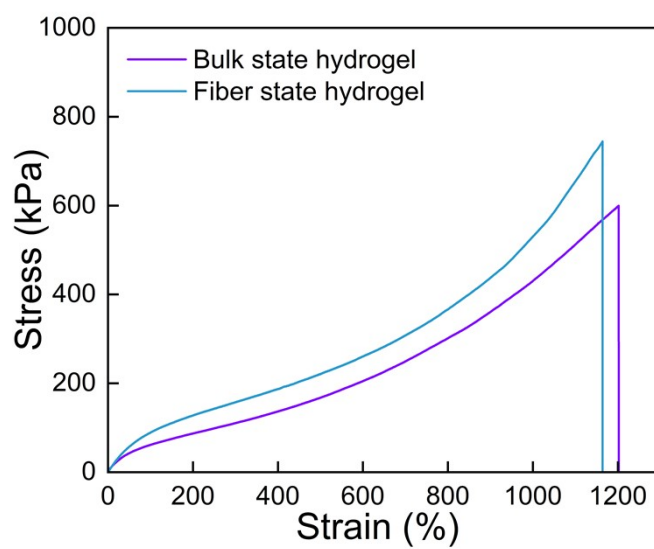

4

5

6 **Fig. S23** Tensile stress-strain curves and mechanical performance of  
 7 PAM/PVA/Tre/Li<sup>+</sup> hydrogels in bulk and fiber states.

8

9

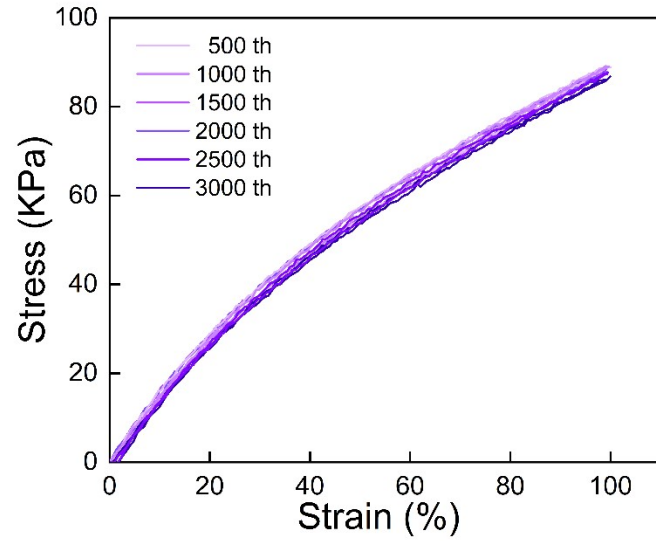

1

2 **Fig. S24** Detailed stress-recovery curves and stability test of the fiber state hydrogel

3 under a cyclic stretch of 100.0% for 3000 cycles.

4

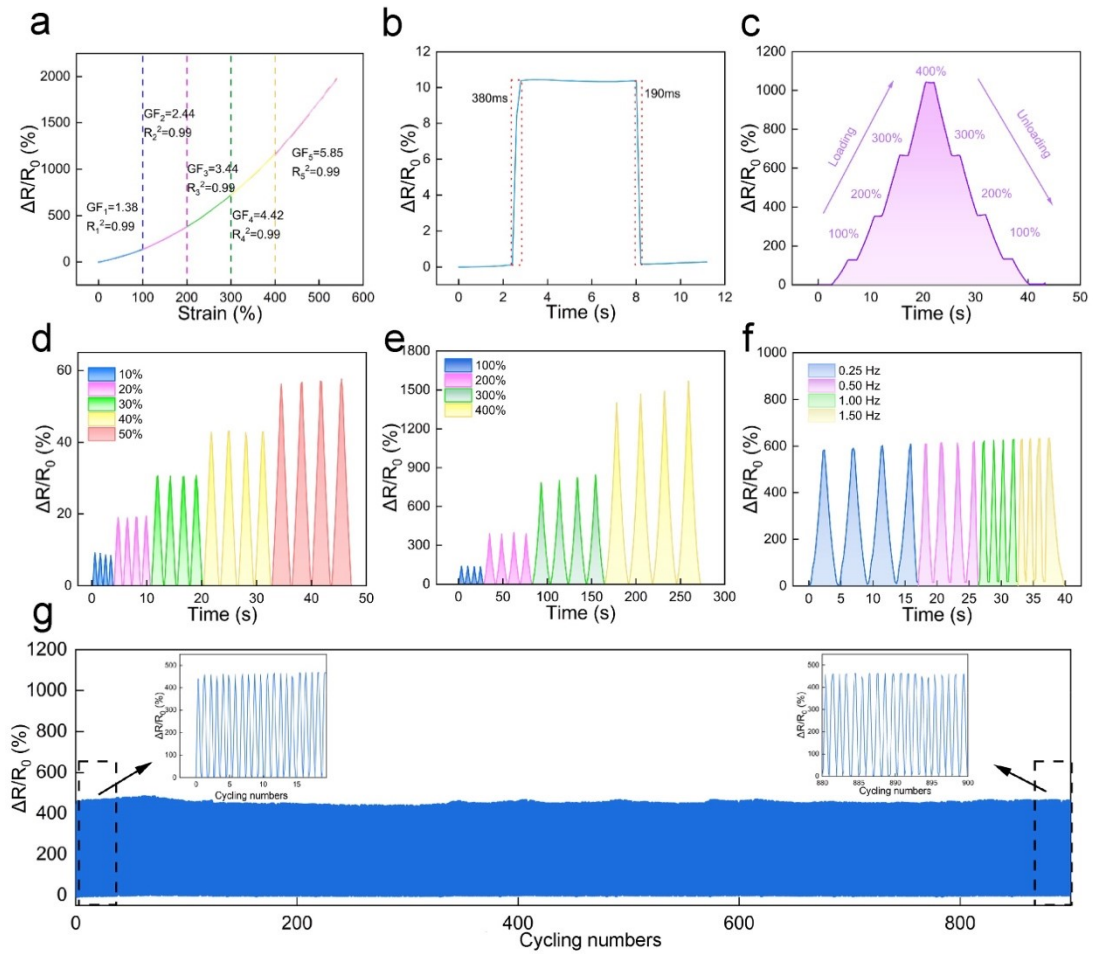

1  
 2 **Fig. S25** (a) The relative resistance changes of the hydrogel fiber sensor as a function  
 3 of strain. (b) Response and recovery times of the hydrogel fiber sensor. (c) The  
 4 dynamic response of the hydrogel fiber sensor to sequential step-stretching of 100%  
 5 and releasing back. (d-e) The relative resistance changes of the hydrogel fiber sensor  
 6 during cyclic loading and unloading under small and large strains. (f) The relative  
 7 resistance changes of the hydrogel fiber sensor during stretching to 200.0% strain at  
 8 different strain frequency (from 0.25 Hz to 1.50 Hz). (g) The cycling sensing behavior  
 9 of the hydrogel fiber sensor for 1000 cycles at a strain of 200.0%.

10

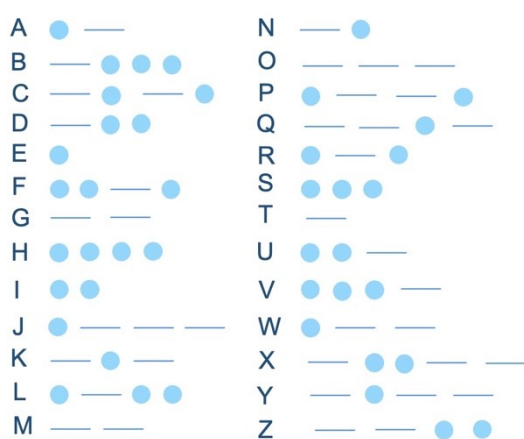

1

2 **Fig. S26** Schematic diagram of communication transmission by Morse code.

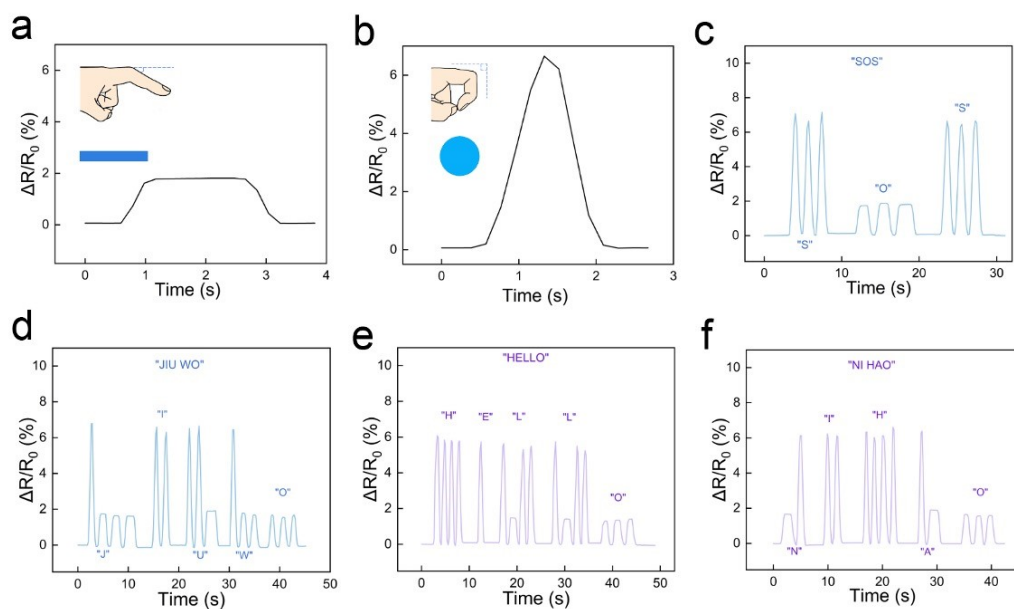

3

4 **Fig. S27** Wearable applications of flexible resistive fiber sensors based on  
 5 PAM/PVA/Tre/Li<sup>+</sup> hydrogels. (a and b) Signal of relative resistance changes of Morse  
 6 code, where short lines represent bending angles from 90° to 30° and dots represent  
 7 finger bending angles from 90.0° to 0° and (c-f) The hydrogel fiber sensor  
 8 communicates through Morse code.

9

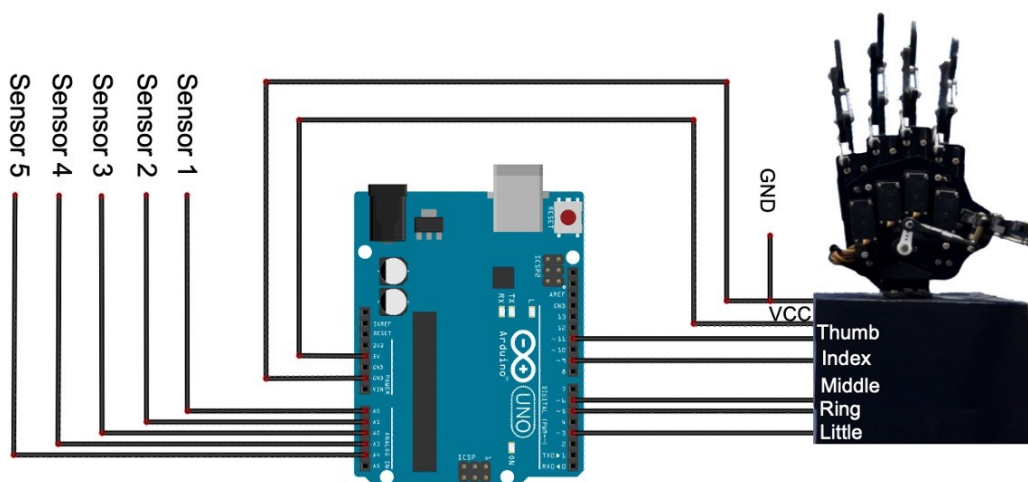

1

2 **Fig. S28** Schematic illustration of the human-machine interaction system connection.

3

4 **Table S1.** Summary of performance results of reported conductive hydrogel.

| Conductive component                                | Tensile strain (%) | Hysteresis (%) | Ref.      |
|-----------------------------------------------------|--------------------|----------------|-----------|
| NaCl                                                | 100.0              | 6.2            | 1         |
| /                                                   | 125.0              | 4.6            | 2         |
| CaCl <sub>2</sub>                                   | 200.0              | 7.0            | 3         |
| NaCl                                                | 100.0              | 5.5            | 4         |
| [EMIm] <sup>+</sup> [BF <sub>4</sub> ] <sup>-</sup> | 200.0              | 5.0            | 5         |
| PVA-SBQ                                             | 100.0              | 5.3            | 6         |
| LiCl                                                | 100.0              | 2.2            | 7         |
| MXene                                               | 100.0              | 7.0            | 8         |
| LiCl                                                | 100.0              | 10.0           | 9         |
| LiCl                                                | 200.0              | 3.0            | This work |

5

6

1 **Table S2.** Summary of performance results of reported conductive hydrogel.

| Conductive component | Tensile strain (%) | Gauge factor (%) | Ref.      |
|----------------------|--------------------|------------------|-----------|
| LiCl                 | 514.2              | 1.1              | 10        |
| LiCl                 | 164.0              | 1.15             | 11        |
| ZnCl <sub>2</sub>    | 300.0              | 1.14             | 12        |
| LiCl                 | 500.0              | 1.07             | 13        |
| AgNWs                | 200.0              | 0.76             | 14        |
| PEDOT:PSS            | 200.0              | 0.56             | 15        |
| NaCl                 | 150.0              | 0.95             | 16        |
| PANa                 | 100.0              | 0.45             | 17        |
| LiCl                 | 800.0              | 1.30             | This work |

2

### 3 **References**

- 4 1. K. Lei, Q. Jiang, X. Wang and D. Gong, *Macromol. Rapid Commun.*, 2025, 46,  
5 2401134.
- 6 2. B. Zhang, J. Qiu, X. Meng, E. Sakai, H. Feng, L. Zhang, J. Tang, G. Zhang, H.  
7 Wu and S. Guo, *ACS Appl. Mater. Interfaces*, 2024, 16, 57769-57777.
- 8 3. L. Zhou, B. Zhao, J. Liang, F. Lu, W. Yang, J. Xu, J. Zheng, Y. Liu, R. Wang  
9 and Z. Liu, *Mater. Horiz.*, 2024, 11, 3856-3866.
- 10 4. J. Xu, J. Liang, J. Zheng, F. Lu, Y. Ma, H. Yu, W. Zhao, R. Wang and Z. Liu, *J.*  
11 *Mater. Chem. A*, 2025, 13, 12256-12265.
- 12 5. S. Dai, C. Zhong, J. Yao, L. Zeng, Y. Zhong, S. Xie, W. Huang, W. Chen and Y.  
13 Sui, *Colloids Surf., A*, 2025, 710, 136212.
- 14 6. G. Lu, C. Li, G. Wang, J. Nie and X. Zhu, *Sens. Actuators, A*, 2023, 353,  
15 114223.

- 1 7. Y. Wang, L. Song, Q. Wang, L. Wang, S. Li, H. Du, C. Wang, Y. Wang, P.  
2 Xue, W. C. Nie, X. Wang and S. Tang, *Carbohydr. Polym.*, 2023, 318, 121106.
- 3 8. J. Zou, X. Jing, S. Li, P. Feng, Y. Chen and Y. Liu, *Small*, 2024, 20, e2401622.
- 4 9. Y. Zhao, Q. Zhao, S. Peng, H. Zhou and L. Yang, *J. Mater. Chem. C*, 2023, 11,  
5 16135-16142.
- 6 10. X. Sun, F. Luo and F. Jiang, *Macromol. Rapid Commun.*, 2025,
- 7 11. X. Pan, H. Zhu, F. Qin, M. Jing, H. Wu and Z. Sun, *Sensors* 2025, 25, 20250801.
- 8 12. H. Huo, H. Shi, H. Yang, X. Zhang, J. Wan, J. Shen, G. Du and L. Yang, *J.*  
9 *Mater. Chem. A*, 2024, 12, 27506-27517.
- 10 13. D. Cui, Y. Sun, T. Li, Z. Hu, Y. Zhao, X. Wang, S. Chen, Z. Toktarbay and H.  
11 Wei, *Adv. Compos. Hybrid Mater.*, 2025, 8, 233.
- 12 14. S. Azadi, S. Peng, S. A. Moshizi, M. Asadnia, J. Xu, I. Park, C. H. Wang and S.  
13 Wu, *Adv. Mater. Technol.* , 2020, 5, 2000426.
- 14 15. J. Zhou, J. Zheng, C. Wang, M. Fan, S. Wang, F. Xiong, Y. Li and C. Yang, *RSC*  
15 *Adv.*, 2026, 16, 1240-1254.
- 16 16. H. Wu, Y. Wu, J. Yan, W. Xiao, Y. Wang, H. Zhang, X. Huang, H. Xue, L.  
17 Wang, L. Tang, Y. Mai and J. Gao, *Chem. Eng. J.* , 2024, 488, 150963.
- 18 17. S. Zhang, Y. Li, H. Zhang, G. Wang, H. Wei, X. Zhang and N. Ma, *ACS Mater.*  
19 *Lett.*, 2021, 3, 807-814.
- 20
